# Supplementary material for: Repurposing of Omarigliptin as a Neuroprotective Agent Based on Docking with A2A Adenosine and AChE Receptors, Brain GLP-1 Response and Its Brain/Plasma Concentration Ratio after 28 Days Multiple Doses in Rats Using LC-MS/MS
Source: PubMed Central journal article supplement (PMC7915074; doi:10.3390/molecules26040889), 2021-02-08
Supplement: molecules-26-00889-s001.pdf [file molecules-26-00889-s001.pdf]

Supplementary material

|   | Molecule                                                                                              |  |  |  | VIDA ID | FRED Chemgauss4 score |
|---|-------------------------------------------------------------------------------------------------------|-----------------------------------------------------------------------------------|-----------------------------------------------------------------------------------|-----------------------------------------------------------------------------------|---------|-----------------------|
| 1 | Unnamed molecule<br> | •                                                                                 | •                                                                                 | •                                                                                 | 6       |                       |
| 2 | Fragment<br>         |  | •                                                                                 | •                                                                                 | 8       | -8.3346               |

Figure S1. Docking score of OMR (Fragment No#2) relative to the receptor ligand.

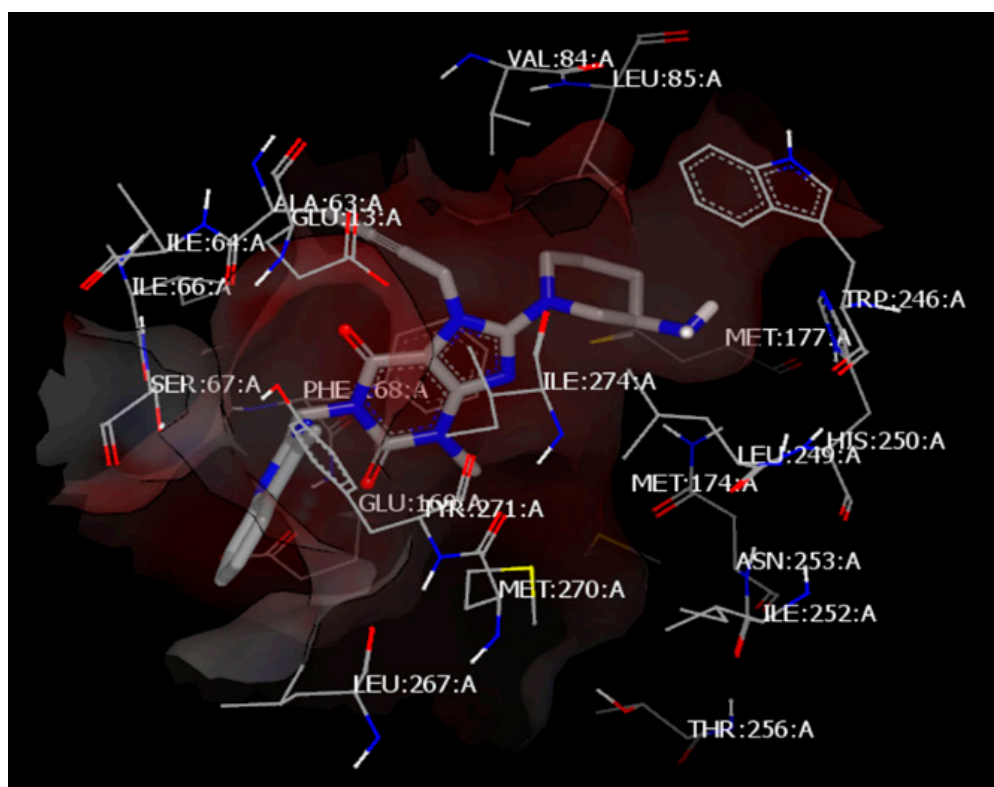

Figure S2. Predicted binding mode of alogliptin with 3PWH of A2AAR.

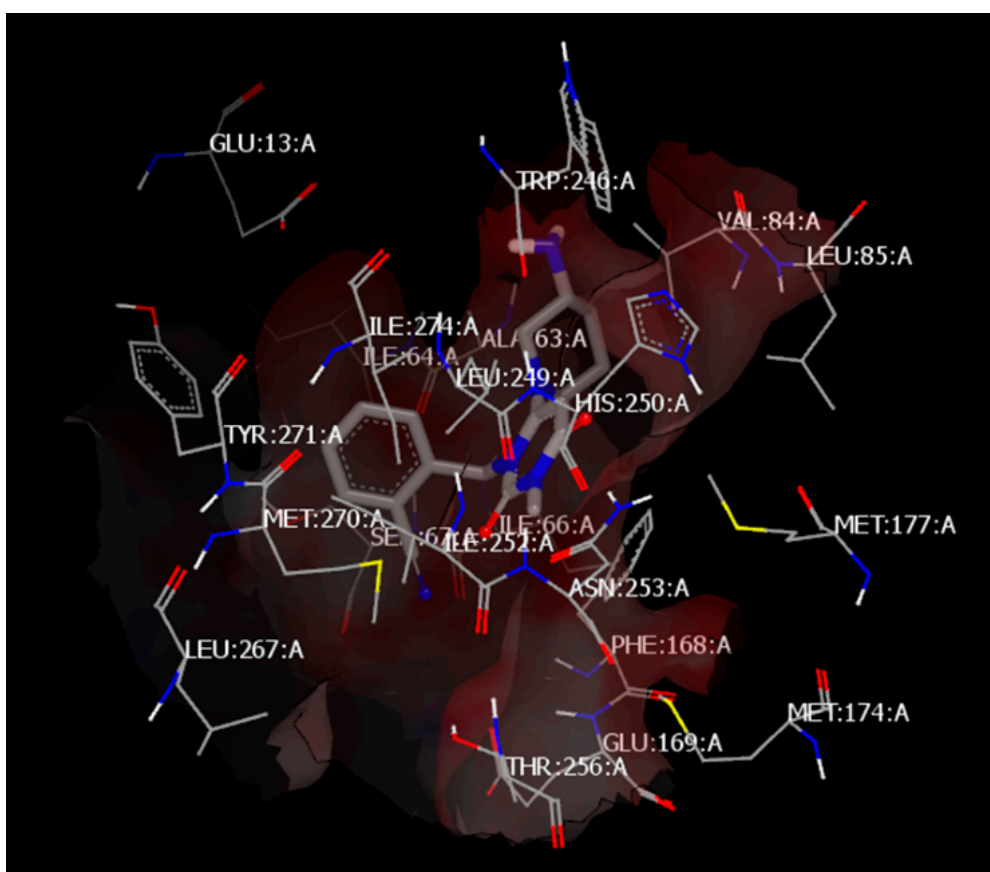

Figure S3. Predicted binding mode of linagliptin with 3PWH of A2AAR.

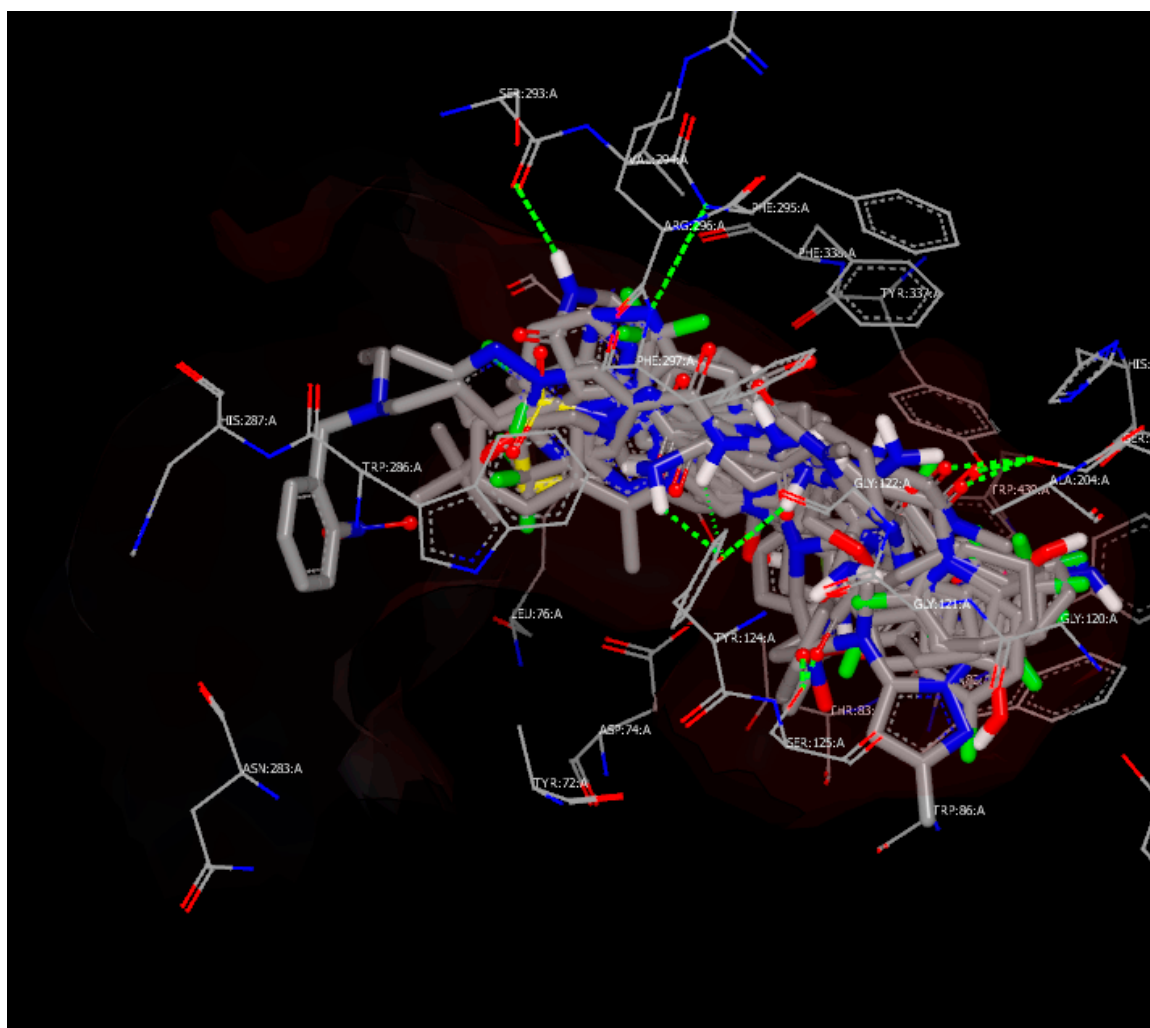

**Figure S4.** DPP-4 inhibitors with AChE receptor adapt different binding behaviors due to lack of structure similarity between the gliptins

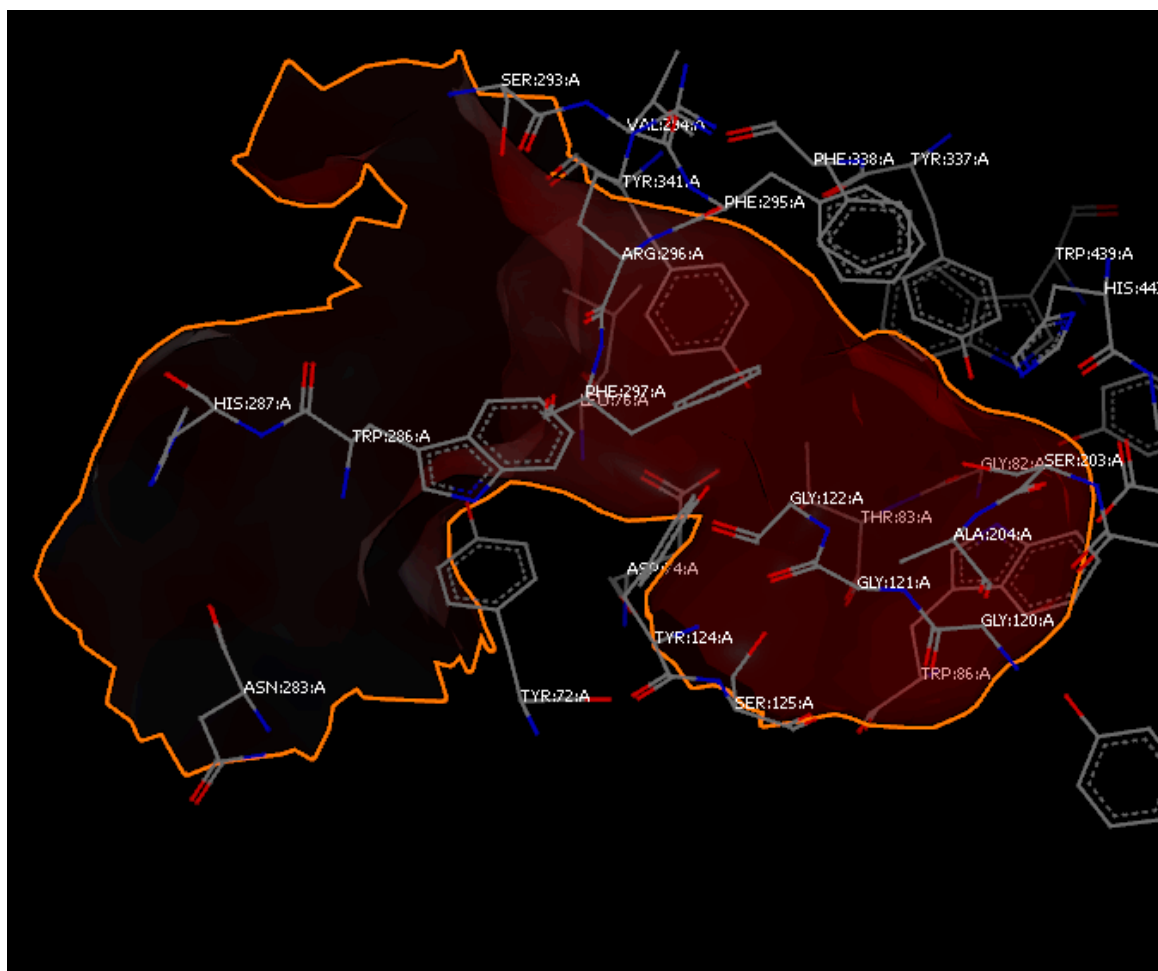

**Figure S5.** The remarkable finding that the longer the designed structure the better to fit in the C shaped receptor pocket

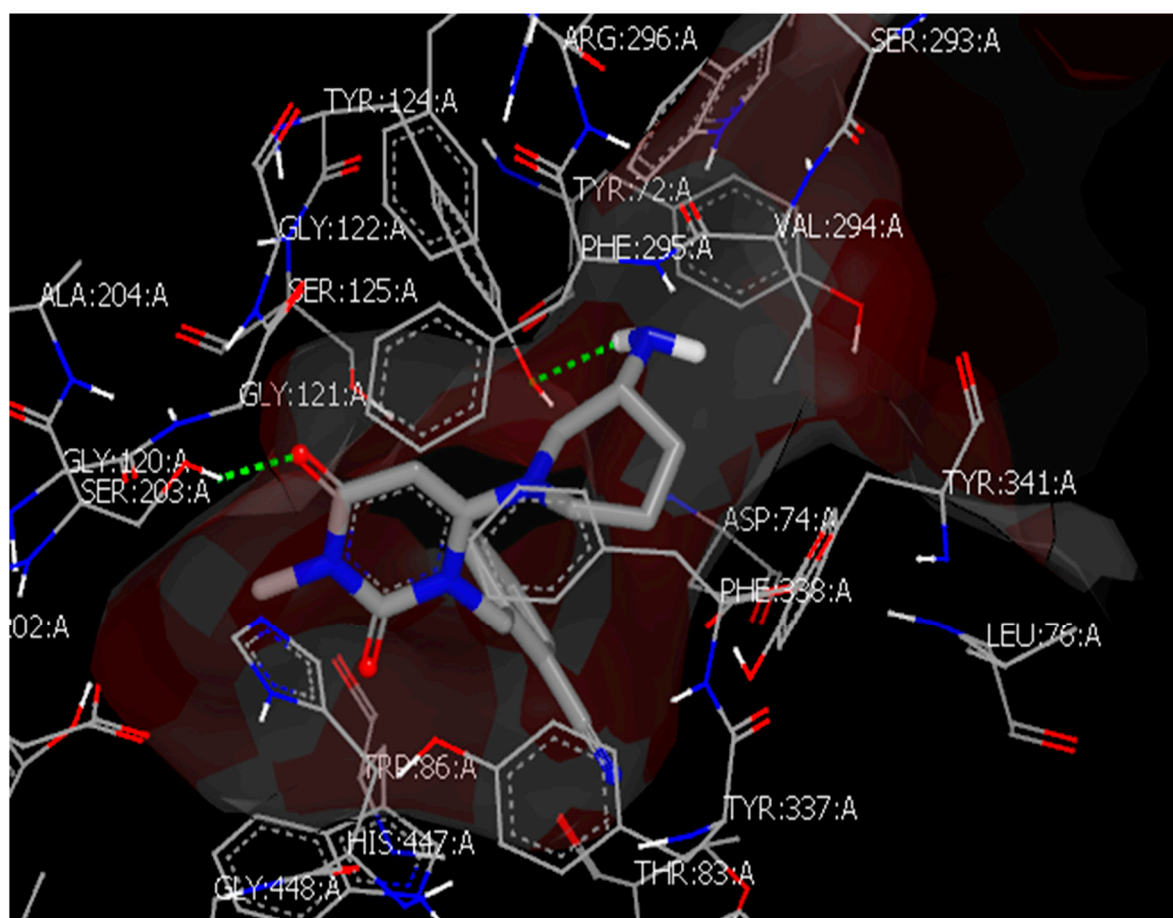

**Figure S6.** Alogliptin is fitted well with AChE forming two hydrogen bonds with TYR 124 and SER 203, plus the fitting within narrow bridge in receptor

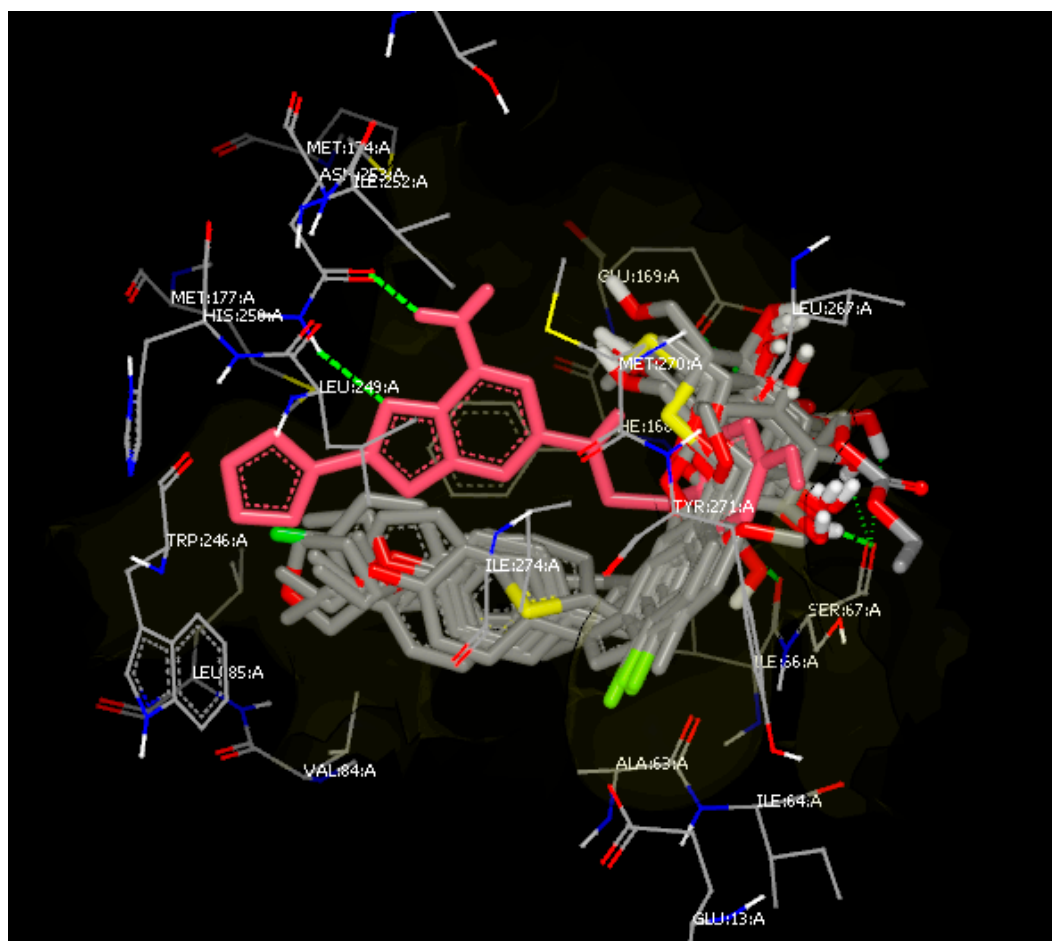

**Figure S7.** Different binding behavior of SGLT2 inhibitors and the cocrystallized ligand (in pink) of 6f25 in PDB.
